# Supplementary material for: Size-controlled growth of cubic boron phosphide nanocrystals
Source: Royal Society of Chemistry journal article supplement (doi:10.1039/c4ra13530j), 2014-12-24
Supplement: c4ra13530j1.pdf [file c4ra13530j1.pdf]

## Supporting Information

# Size-Controlled Growth of Cubic Boron Phosphide Nanocrystals

Hiroshi Sugimoto<sup>a</sup>, Minoru Fujii<sup>\*a</sup> and Kenji Imakita<sup>a</sup>

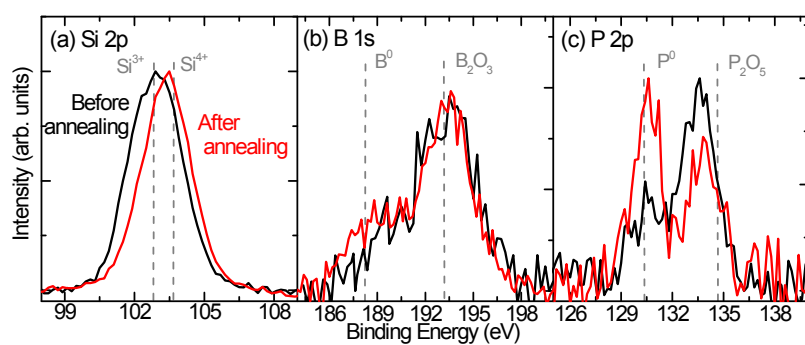

**Figure S1.** XPS spectra of film sample (BP8) before and after annealing. (a) Si 2p (b) B 1s (c) P 2p.

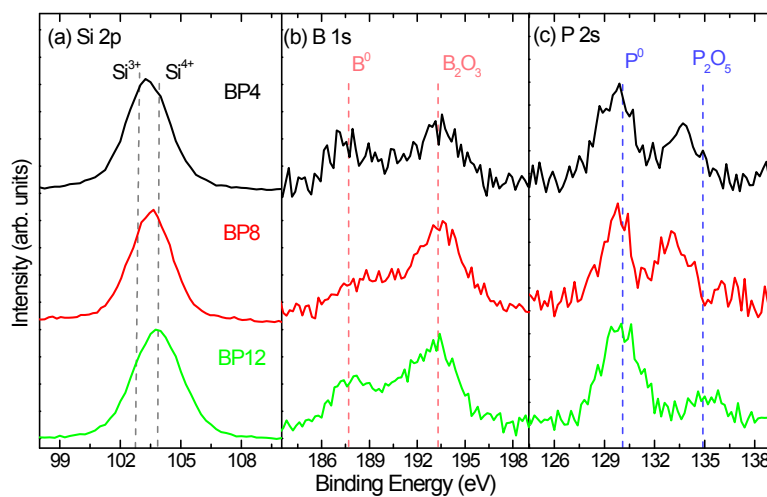

**Figure S2.** XPS spectra of film samples (BP4, BP8 and BP12) after annealing. (a) Si 2p (b) B 1s (c) P2p.

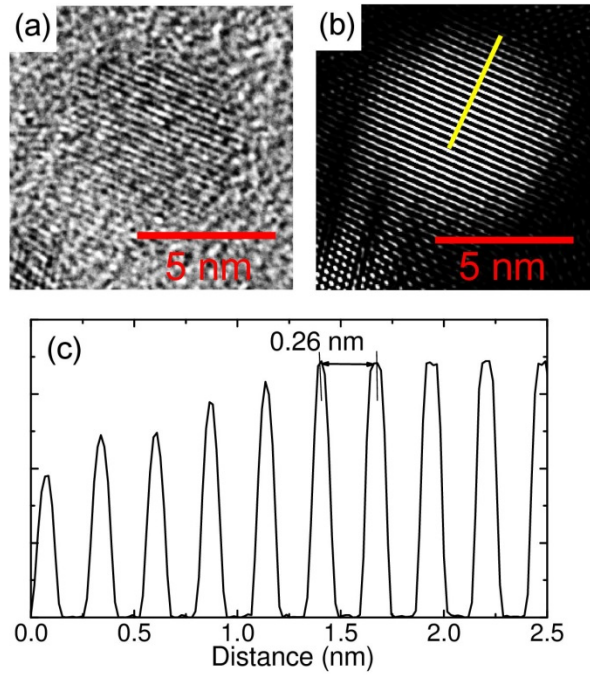

**Figure S3.** (a) High resolution TEM image of a BP nanocrystal. (b) Inverse fast Fourier transform image after FFT and selecting spots corresponding to  $\{111\}$  planes of BP crystal in (a). (c) Intensity profile along the yellow line in (b).

#### *Size-estimation of BP4 from electron diffraction patterns*

The size of nanocrystals in BP4 is estimated from the width of the electron diffraction peak by employing the Scherrer equation:

$$D = \frac{K\lambda}{\beta \cos \theta},$$

where,  $D$  is the diameter of nanocrystals,  $K$  is a constant determined by particle morphology,  $\beta$  is the full width at half-maximum (FWHM) of the diffraction peak, and  $\theta$  is the center position of the peak. Under the assumption that  $K$ ,  $\lambda$  and  $\theta$  are the same between BP4 and BP8, the ratio of the diameter ( $D_{BP4}/D_{BP8}$ ) is equal to that of the FWHM ( $\beta_{BP4}/\beta_{BP8}$ ) as,

$$\frac{D_{BP4}}{D_{BP8}} = \frac{\frac{K\lambda}{\beta_{BP4} \cos \theta}}{\frac{K\lambda}{\beta_{BP8} \cos \theta}} = \frac{\beta_{BP8}}{\beta_{BP4}}$$

By using the diameter of BP8 obtained from TEM images (4.3 nm), the diameter of BP4 is estimated to be 2.2

nm.

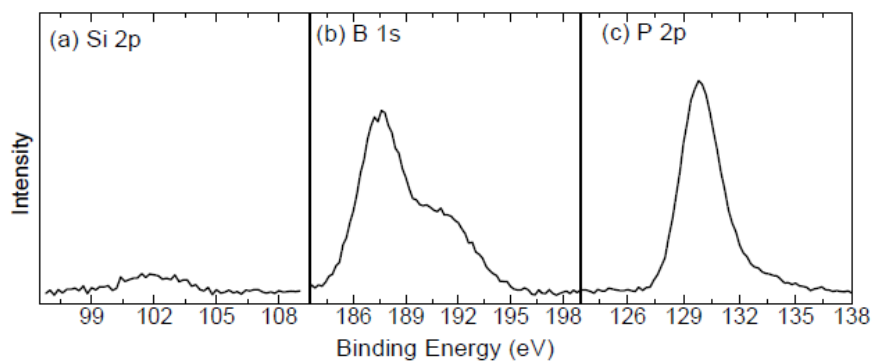

**Figure S4.** XPS spectra of BP8 after HF etching. (a) Si 2p (b) B 1s (c) P2p.

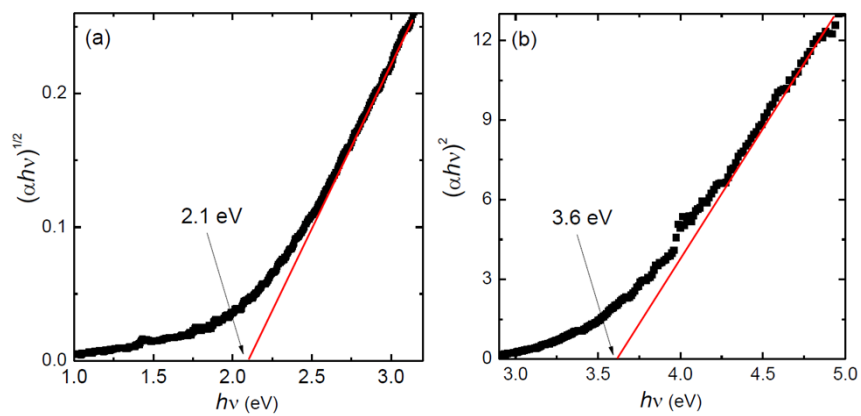

**Figure S5.** Tauc-plots of BP nanocrystals (BP8) for (a) indirect and (b) direct transitions
